1 **TITLE**

2 **Hsf1 phosphorylation generates cell-to-cell variation in Hsp90 levels and**  
3 **promotes phenotypic plasticity**

4  
5 **AUTHORS**

6 Xu Zheng<sup>1,\*</sup>, Ali Beyzavi<sup>2,5,\*</sup>, Joanna Krakowiak<sup>1</sup>, Nikit Patel<sup>3</sup>, Ahmad S. Khalil<sup>3,4,#</sup>, David  
7 Pincus<sup>1,#,§</sup>

8  
9 <sup>1</sup> Whitehead Institute for Biomedical Research, Cambridge, USA

10 <sup>2</sup> Department of Mechanical Engineering, Boston University, Boston, USA

11 <sup>3</sup> Department of Biomedical Engineering and Biological Design Center, Boston University,  
12 Boston, USA

13 <sup>4</sup> Wyss Institute for Biologically Inspired Engineering, Harvard University, Boston, USA

14 <sup>5</sup> Present address: Koch Institute for Integrative Cancer Research, Cambridge, USA

15 \* These authors contributed equally

16  
17 # Correspondence: [khalil@bu.edu](mailto:khalil@bu.edu), [pincus@wi.mit.edu](mailto:pincus@wi.mit.edu)

18 § Lead contact: [pincus@wi.mit.edu](mailto:pincus@wi.mit.edu)

19

20

21 **ABSTRACT**

22 Clonal populations of cells exhibit cell-to-cell variation in the transcription of individual genes. In  
23 addition to this “noise” in gene expression, heterogeneity in the proteome and the proteostasis  
24 network expands the phenotypic diversity of a population. Heat shock transcription factor (Hsf1)  
25 regulates chaperone gene expression, thereby coupling transcriptional noise to proteostasis.  
26 Here we show that cell-to-cell variation in Hsf1 activity is an important determinant of phenotypic  
27 plasticity. Budding yeast cells with high Hsf1 activity were enriched for the ability to acquire  
28 resistance to an antifungal drug, and this enrichment depended on Hsp90 – a known  
29 “phenotypic capacitor” and canonical Hsf1 target. We show that Hsf1 phosphorylation promotes  
30 cell-to-cell variation, and variation in Hsf1 activity – rather than absolute Hsf1 activity – promotes  
31 antifungal resistance. We propose that Hsf1 phosphorylation enables differential tuning of the  
32 proteostasis network in individual cells, allowing populations to access a wide range of  
33 phenotypic states.

34

35

## 36 INTRODUCTION

37 Genetically identical cells grown together in the same environment nonetheless display cell-to-  
38 cell variation in gene expression (Colman-Lerner et al., 2005; Elowitz et al., 2002; Raser and  
39 O'Shea, 2004, 2005; Weinberger et al., 2005). While most frequently observed in  
40 microorganisms, such as bacteria and yeast, gene expression variation is also found in  
41 developing mammalian cells and human embryonic stem cells (Silva and Smith, 2008; Stelzer  
42 et al., 2015). Such variation has been proposed to be the mechanistic underpinning of lineage  
43 commitment during human development, the epithelial to mesenchymal transition in cancer  
44 metastasis, organ regeneration in planarians, bacterial persistence in the presence of  
45 antibiotics, and the ability of yeast cells to remain fit in fluctuating environments (Harms et al.,  
46 2016; Newman et al., 2006; Oderberg et al., 2017; Silva and Smith, 2008; Ye and Weinberg,  
47 2015). While differences in cell size, cell cycle position and chromatin state can partially account  
48 for cell-to-cell variation, much of the variability has been attributed to the inherently stochastic  
49 process of gene expression (Colman-Lerner et al., 2005; Raj and van Oudenaarden, 2008;  
50 Raser and O'Shea, 2005). Despite the underlying stochasticity, gene expression variation itself  
51 varies widely across the genome, with some sets of genes showing very low variation among  
52 cells (e.g., ribosomal protein genes) and other sets of genes (e.g., stress responsive genes)  
53 showing high levels of variation (Newman et al., 2006). Yet, individual genes within these  
54 regulons show strong covariance, indicating the source of the variation lies in the activity of  
55 upstream transcription factors and signaling pathways (Stewart-Ornstein et al., 2012). As such,  
56 cell-to-cell variation may be a property that is under genetic control and can be tuned up and  
57 down over evolution.

58

59 On top of this gene expression variation, cell-to-cell differences also exist in the state of the  
60 proteome. Perhaps the most striking examples of proteome variation come from prion proteins,  
61 which can exist in either soluble or self-templating amyloid conformations (Shorter and

62 Lindquist, 2005). Prions have been shown to have the ability to broadly reshape the proteome  
63 by challenging chaperones and other components of the protein homeostasis (proteostasis)  
64 machinery and even by globally altering protein translation (Serio and Lindquist, 1999; Shorter  
65 and Lindquist, 2008). Moreover, chaperones themselves can exist in large heterotypic  
66 complexes that differ between cells in what has been termed the “epichaperome,” giving rise to  
67 altered susceptibility of cancer cells to drugs that target the essential chaperone Hsp90 (Rodina  
68 et al., 2016). By buffering the proteome and stabilizing near-native protein folds, Hsp90 has  
69 been shown to mask latent genetic variation in fruit flies and plants and to enhance the ability of  
70 yeast cells to acquire novel phenotypes such as resistance to anti-fungal drugs (Cowen and  
71 Lindquist, 2005; Queitsch et al., 2002; Rutherford and Lindquist, 1998). In this regard, Hsp90  
72 has been termed a “phenotypic capacitor” (Sangster et al., 2004).

73  
74 Heat shock factor 1 (Hsf1) regulates the expression of many components of the proteostasis  
75 machinery – including Hsp90 – in eukaryotes from yeast to humans. In unstressed budding  
76 yeast cells, a different chaperone, Hsp70, binds to Hsf1 and restrains its activity. Upon heat  
77 shock, Hsp70 dissociates from Hsf1 leaving Hsf1 free to induce expression of its target genes.  
78 Heat shock also triggers Hsf1 hyper-phosphorylation. Although phosphorylation is a conserved  
79 hallmark of Hsf1 activation, it is dispensable for acute Hsf1 activity during heat shock. Rather  
80 than switching Hsf1 on, phosphorylation enables Hsf1 to sustain increased activity during  
81 prolonged exposure to elevated temperature. Here we identify a novel role for Hsf1 – and Hsf1  
82 phosphorylation – that may have provided a strong selective advantage during evolution. We  
83 show that Hsf1 generates cell-to-cell variation in Hsp90 levels, which in turn contributes to the  
84 ability of *Saccharomyces cerevisiae* to acquire resistance to the antifungal drug fluconazole. We  
85 find that the ability of Hsf1 to become phosphorylated is a key factor in generating population  
86 level heterogeneity in its activity. We propose that by coordinately controlling cytosolic  
87 chaperone genes including Hsp90, Hsf1 promotes phenotypic plasticity.

88

## 89 **RESULTS**

### 90 **Differential cell-to-cell variation in Hsf1 activity in response to heat shock and AZC**

91 In addition to heat shock, Hsf1 is known to respond to a variety of chemical stressors that impair  
92 proteostasis. In particular, the small molecule azetidine 2-carboxylic acid (AZC) is known to  
93 strongly activate Hsf1 (Trotter et al., 2002). AZC is a proline analog that is charged onto tRNA<sup>pro</sup>  
94 and incorporated into nascent proteins during translation, impairing their subsequent folding  
95 (Fowden and Richmond, 1963). Our previous mass spectrometry data indicated that Hsf1  
96 displays distinct phosphorylation patterns in cells that had been heat shocked compared to cells  
97 treated with AZC (Zheng et al., 2016). To explore these differences, we monitored  
98 phosphorylation of FLAG-tagged Hsf1 following heat shock and treatment with AZC by  
99 observing its electrophoretic mobility over time by western blot. Heat shock induced progressive  
100 and sustained Hsf1 phosphorylation leading to a dramatic shift in its mobility over the heat  
101 shock time course (Figure 1A). By contrast, AZC led to only a modest shift in Hsf1 mobility  
102 (Figure 1A). Despite these differences in phosphorylation, both heat shock and AZC robustly  
103 induced Hsf1 transcriptional activity as measured by flow cytometry of cells expressing HSE-  
104 YFP, a fluorescent reporter of Hsf1 transcriptional activity (Figure 1B) (Zheng et al., 2016).  
105 While heat shock resulted in rapid HSE-YFP induction, plateauing after 1 hour, AZC induced  
106 Hsf1 activity with delayed but sustained kinetics, ultimately leading to the same maximal output  
107 level as heat shock after 4 hours (Figure 1B).

108

109 Along with altered activation kinetics, we observed differences in the single cell fluorescence  
110 distributions: the populations of cells that had been heat shocked showed a broad distribution of  
111 HSE-YFP levels, while cells treated with AZC showed narrower distributions, indicating reduced  
112 levels of cell-to-cell variation in Hsf1 activity. To account for potential differences in cell size, we  
113 normalized each cell's HSE-YFP fluorescence by its size as measured by side scatter (SSC)

114 and plotted the resulting normalized distributions over the heat shock and AZC time courses  
115 (Figure 1C, D) (Stewart-Ornstein et al., 2012). Direct comparison of the HSE-YFP/SSC  
116 distributions following 4 hours of heat shock or treatment with AZC reveals that despite a slightly  
117 higher average level of Hsf1 activation in the AZC-treated cells, cellular heterogeneity is greatly  
118 reduced compared to heat shocked cells (Figure 1E). To quantify this cell-to-cell variation in the  
119 HSE-YFP reporter, we calculated the square of the coefficient of variation ( $CV^2$ ) (Stewart-  
120 Ornstein et al., 2012). While the  $CV^2$  drops as the mean increases for both heat shocked and  
121 AZC-treated cells, it is 3-fold higher in heat-shocked cells by the end of the experiment (Figure  
122 1F). These data show that while heat shock and AZC both potently activate Hsf1, they do so  
123 with distinctive features. Heat shock triggers rapid Hsf1 activation coupled to high levels of  
124 phosphorylation and results in a high degree of cell-to-cell variation in the HSE-YFP reporter. By  
125 contrast, AZC induces slow, sustained Hsf1 activation, modest Hsf1 phosphorylation and  
126 reduced noise in the HSE-YFP reporter.

127

### 128 **Hsf1 phosphorylation generates cell-to-cell variation during heat shock**

129 Since increased Hsf1 phosphorylation was associated with increased cell-to-cell variation in the  
130 HSE-YFP reporter, we wondered if Hsf1 phosphorylation was responsible for increasing noise  
131 during heat shock. To test this, we leveraged a non-phosphorylatable mutant we had previously  
132 generated, Hsf1<sup>Δpo4</sup>, in which we mutated all 152 possible sites of phosphorylation to alanine  
133 (Zheng et al., 2016). We performed a heat shock time course and measured the HSE-YFP  
134 reporter by flow cytometry in wild type cells and cells expressing Hsf1<sup>Δpo4</sup>. Indeed, after  
135 normalizing for cell size, we observed reduced noise in the HSE-YFP reporter in the Hsf1<sup>Δpo4</sup>  
136 cells compared to wild type throughout the heat shock time course (Figure 2A, B). As an  
137 orthogonal approach to measure cell-to-cell variation in Hsf1 activity, we developed a  
138 microfluidic-based assay to measure the HSE-YFP reporter in single cells over time in response  
139 to heat shock using a novel platform that enables precision temperature control (Figure 2C,

140 Figure S1). In agreement with the flow cytometry data, cells expressing Hsf1<sup>Δpo4</sup> showed lower  
141 noise in HSE-YFP levels over the heat shock time course (Figure 2D, E). Thus, Hsf1  
142 phosphorylation promotes cell-to-cell variation in Hsf1 activity during heat shock.

143

#### 144 **Hsp90 expression displays Hsf1-dependent cell-to-cell variation**

145 To investigate functional roles for cell-to-cell variation in Hsf1 activity, we monitored expression  
146 of Hsp90, an endogenous Hsf1 target gene known to influence phenotypic plasticity (Cowen  
147 and Lindquist, 2005). Budding yeast encodes two Hsp90 paralogs, Hsc82 and Hsp82, with  
148 Hsc82 being highly expressed under all conditions and Hsp82 showing both basal and inducible  
149 expression in response to heat shock (Solis et al., 2016). We tagged Hsp82 with YFP and  
150 monitored its expression in single cells expressing either wild type Hsf1 or Hsf1<sup>Δpo4</sup> by  
151 fluorescence microscopy and flow cytometry. Consistent with the HSE-YFP reporter, Hsp82-  
152 YFP expression showed greater variability among wild type cells than Hsf1<sup>Δpo4</sup> cells (Figure 3A,  
153 B).

154

155 Prior studies have implicated Hsp90 as a “phenotypic capacitor” that promotes the ability of cells  
156 to acquire novel phenotypes (Sangster et al., 2004). In particular, in fungi, Hsp90 has been  
157 shown to increase the rate at which cells acquire resistance to the anti-fungal drug fluconazole  
158 (Cowen and Lindquist, 2005). We hypothesized that the increased cell-to-cell variation in  
159 Hsp82-YFP expression levels in wild type cells compared to Hsf1<sup>Δpo4</sup> cells would translate into  
160 increased fluconazole resistance. Indeed, wild type cells generated significantly more  
161 fluconazole resistant colonies than Hsf1<sup>Δpo4</sup> cells (Figure 3C, D).

162

#### 163 **Acquired fluconazole resistance is enriched in cells with high Hsf1 activity**

164 Since noise in Hsp82-YFP levels and the HSE-YFP reporter correlated with phenotypic  
165 plasticity, we wondered if individual cells with elevated HSE-YFP levels would be more likely to

166 become resistant to fluconazole. To test this, we used fluorescence activated cell sorting  
167 (FACS) to isolate the tails of the HSE-YFP distribution – the 10% of cells with the highest and  
168 lowest HSE-YFP expression levels – in wild type cells, *hsp82Δ* and *hsc82Δ* cells (Figure 3E). In  
169 wild type cells, the tail with high HSE-YFP expression was enriched for fluconazole resistant  
170 colonies over the low expression tail (Figure 3F). By contrast, the high expression tails of the  
171 *hsp82Δ* and *hsc82Δ* cells showed no enrichment, with the *hsc82Δ* high expression tail actually  
172 showing decreased resistance (Figure 3F). These results indicate that cells with higher levels of  
173 Hsf1 activity have an increased ability to acquire resistance to an antifungal drug, and this ability  
174 depends on Hsp90.

175

#### 176 **Fluconazole resistance correlates with variation in Hsf1 activity, not its magnitude**

177 Since the high expression tail of the HSE-YFP distribution was enriched for cells able to acquire  
178 resistance to fluconazole, we hypothesized that if we could increase the average HSE-YFP  
179 expression, we could increase the ability of cells to acquire fluconazole resistance. To test this,  
180 we expressed wild type Hsf1 from a promoter under the control of a synthetic, estradiol-  
181 responsive (ER) transcription factor (Zheng et al., 2016). In this way, we could titrate the amount  
182 of estradiol to tune the expression level of Hsf1, and thereby control the expression level of its  
183 target genes and the HSE-YFP reporter. In parallel, we also expressed Hsf1<sup>Δpo4</sup> using the same  
184 system to determine if the deficit in cell-to-cell variation could be overcome by increasing the  
185 absolute expression (Figure 4A). We grew the wild type and Hsf1<sup>Δpo4</sup> cells in a dilution series of  
186 estradiol, maintained growth at OD<sub>600</sub> < 0.5 for 18 hours and measured the HSE-YFP reporter.  
187 Estradiol induced dose-dependent induction of the HSE-YFP in both wild type and Hsf1<sup>Δpo4</sup>  
188 cells, though with a steeper curve for Hsf1<sup>Δpo4</sup> cells (Figure 4B, C). At all doses of estradiol, wild  
189 type had higher CV<sup>2</sup> in the HSE-YFP reporter than Hsf1<sup>Δpo4</sup> cells (Figure 4B, D). We tested the  
190 ability of cells expressing wild type Hsf1 and Hsf1<sup>Δpo4</sup> at low (1 nM), medium (8 nM) and high (32  
191 nM estradiol) levels to acquire resistance to fluconazole (Figure 4E). Surprisingly, increasing



192 median HSE-YFP did not increase resistance: both wild type and Hsf1<sup>Δpo4</sup> cells showed maximal  
193 resistance at low Hsf1 expression (Figure 4F). However, wild type cells showed greater  
194 resistance at all Hsf1 expression levels than Hsf1<sup>Δpo4</sup> cells (Figure 4F). Thus, increased variation  
195 in HSE-YFP levels – not increased median levels – positively correlates with fluconazole  
196 resistance (Figure 4G-I).

197

## 198 **DISCUSSION**

199 Cell-to-cell variation in gene expression and the state of the proteome have been proposed to  
200 contribute to adaptability in populations of genetically identical cells. Here we identify a single  
201 regulatory mechanism that couples variation at the transcriptional and proteomic levels:  
202 phosphorylation of the transcription factor Hsf1. We found that when wild type Hsf1 is activated  
203 and concomitantly hyperphosphorylated – as is the case during heat shock – cells display high  
204 variation in their expression of downstream Hsf1 target genes. By contrast, when Hsf1 is  
205 activated without hyperphosphorylation following treatment with AZC, cells show more uniform  
206 target gene expression. Moreover, removing the ability of Hsf1 to be phosphorylated reduced  
207 cell-to-cell variation. Since the Hsf1 regulon consists of chaperones and other proteostasis  
208 factors, variation in Hsf1 activity is likely to lead to variation in the proteostasis network and the  
209 state of the proteome.

210

211 Functionally, we demonstrated that cell-to-cell variation in Hsf1 activity is correlated with the  
212 ability of cells to acquire resistance to the antifungal drug fluconazole, in large part via  
213 expression of the known phenotypic capacitor Hsp90. While wild type cells with high levels of  
214 Hsf1 activity were enriched for the ability to acquire fluconazole resistance, cells with reduced  
215 levels of Hsp90 lost this enrichment. This observation suggested that cells with more Hsf1  
216 activity would have more Hsp90 and therefore show increased antifungal resistance. However,  
217 synthetically increasing Hsf1 activity resulted in diminished fluconazole resistance. Moreover,

218 increased expression of non-phosphorylatable Hsf1<sup>Δpo4</sup> – which showed reduced cell-to-cell  
219 variation in its activity compared to wild type Hsf1 – could not compensate for its reduced ability  
220 to support fluconazole resistance. Thus, antifungal resistance correlates with variation in Hsf1  
221 activity rather than with the magnitude of Hsf1 activity.

222

223 How does Hsf1 phosphorylation lead to cell-to-cell variation and why does variation promote  
224 fluconazole resistance? It is likely that differential activation of cell cycle, metabolic and stress  
225 responsive kinase pathways results in differential Hsf1 phosphorylation states and leads to  
226 distinct levels of transcriptional activity in single cells. However, the finding that variation in Hsf1  
227 activity rather than its absolute activity drives resistance is more intriguing. Although cells with  
228 synthetically elevated Hsf1 activity produce more Hsp90, they also overproduce the rest of the  
229 Hsf1 regulon, which may be maladaptive. In addition, with forced Hsf1 activity, cells are unable  
230 to dynamically regulate Hsf1 to precisely tune its activity according to need. While a high level of  
231 Hsf1 activity – and thus Hsp90 levels – may be beneficial early in the process of acquiring  
232 resistance to fluconazole, it may be that a subsequent reduction in Hsf1 activity promotes  
233 proliferation. The capacity for dynamic and coordinated control over the proteostasis network  
234 may endow cells with the plasticity required to maintain fitness in fluctuating environments. By  
235 enabling both population-level variation and dynamic control over the proteostasis network, Hsf1  
236 is a powerful phenotypic capacitor.

237

238

239 **ACKNOWLEDGEMENTS**

240 We dedicate this paper to Susan Lindquist and her scientific legacy. We are grateful to K.  
241 Reynolds and R. Ranganathan for beneficial discussions, to the Whitehead Institute FACS  
242 facility for technical assistance and to N. Azubuine and T. Nanchung for a constant supply of  
243 plates and media. This work was supported by an NIH Early Independence Award (DP5  
244 OD017941-01 to D.P.) and a National Science Foundation CAREER Award (MCB-1350949 to  
245 A.S.K.).

246

247 **AUTHOR CONTRIBUTIONS**

248 Conceptualization, D.P. and A.S.K; Methodology, X.Z., A.B. N.P.; Investigation, X.Z., A.B., J.K.,  
249 D.P., N.P.; Writing, D.P. and A.S.K; Funding Acquisition, D.P. and A.S.K.; Supervision, D.P. and  
250 A.S.K.

251

252 **FIGURE LEGENDS**

253 **Figure 1. Differential cell-to-cell variation in Hsf1 activity in response to heat shock and**  
254 **AZC.**

255 **(A)** Anti-FLAG Western blot showing Hsf1 phosphorylation by electrophoretic mobility shift over  
256 time in response to heat shock at 39°C or 4 mM AZC.

257 **(B)** Hsf1 activity quantified by the levels of the HSE-YFP transcriptional reporter measured by  
258 flow cytometry over time in response to heat shock at 39°C or 4 mM AZC. The reporter consists  
259 of four repeats of the heat shock element (HSE) recognized by Hsf1 upstream of a crippled  
260 *CYC1* promoter. Each point represents the median of the fluorescence distribution of 10000  
261 cells averaged over 3 biological replicates; error bars show the standard deviation of the  
262 replicates.

263 **(C)** Single cell fluorescence distributions over a 4-hour heat shock time course. For each cell,  
264 the YFP level was normalized by side scatter (HSE-YFP/SSC) to control for cell size.

265 **(D)** As in (C), but over a time course of treatment with 4 mM AZC.

266 **(E)** Overlay of the 4-hour time points from (C) and (D).

267 **(F)** Quantification of cell-to-cell variation in HSE-YFP/SSC levels over time courses in (C) and  
268 (D) using the square of the coefficient of variation ( $CV^2$ ) as a metric.

269

270 **Figure 2. Hsf1 phosphorylation generates cell-to-cell variation during heat shock.**

271 **(A)** Single cell fluorescence distributions over a heat shock time course in wild type cells and  
272 cells expressing Hsf1<sup>Δp04</sup> as the only copy of Hsf1.

273 **(B)** Quantification of cell-to-cell variation in HSE-YFP/SSC levels over time courses in (A).

274 **(C)** Images of wild type cells expressing the HSE-YFP reporter growing over time in a  
275 microfluidic device at 25°C and shifted to 39°C at the indicated time. Scale bar is 10 μm.

276 **(D)** Quantification of HSE-YFP levels over time in the microfluidic device in wild type cells and  
277 cells expressing Hsf1<sup>Δp04</sup> as the only copy of Hsf1. For each cell, the total YFP fluorescence was

278 divided by cell area to account for cell size differences. Each gray trace represents the trajectory  
279 of a single cell and the thick lines show population averages.

280 **(E)** Quantification of cell-to-cell variation in HSE-YFP levels over time courses in (D).

281

282 **Figure 3. Cell-to-cell variation in Hsf1 activity promotes antifungal resistance in an**  
283 **Hsp90-dependent manner.**

284 **(A)** Spinning disc confocal images of wild type cells and Hsf1<sup>Δpo4</sup> cells expressing Hsp82-YFP.

285 Scale bar is 10 μm.

286 **(B)** Single cell fluorescence distributions of wild type cells and Hsf1<sup>Δpo4</sup> cells expressing Hsp82-  
287 YFP as determined by flow cytometry.

288 **(C)** Appearance of fluconazole-resistant colonies in wild type cells and Hsf1<sup>Δpo4</sup> cells. 10<sup>6</sup> cells  
289 were plated on YPD plates supplemented with 128 μg/ml fluconazole and incubated at room  
290 temperature for 4 days.

291 **(D)** Quantification of the number of fluconazole resistant colonies from three biological replicates  
292 of the experiment shown in (C). Error bars show the standard deviation of the replicates (\* p <  
293 0.05; \*\* p < 0.01 by two-tailed T-test).

294 **(E)** Single cell fluorescence distributions of HSE-YFP/SSC in wild type and Hsp90 mutant cells.  
295 under basal conditions. Deletion of *HSP82* leads to a modest increase in HSE-YFP levels, while  
296 deletion of *HSC82* leads to a dramatic increase in HSE-YFP levels. The blue and red boxes  
297 indicate the tails of the distribution with the highest and lowest expressing 10% of cells.

298 **(F)** Quantification of the number of fluconazole resistant colonies in the tails of the distributions  
299 shown in (E) (\* p < 0.05; \*\* p < 0.01 by two-tailed T-test)..

300

301 **Figure 4. Fluconazole resistance correlates with cell-to-cell variation in Hsf1 activity.**

302 **(A)** Schematic showing the estradiol-inducible system used to titrate expression of wild type  
303 Hsf1 and Hsf1<sup>Δpo4</sup>. A chimeric transcription factor containing the ligand binding domain of the

304 human estrogen receptor drives the expression of Hsf1 as a function of the concentration of  
305 estradiol added to the growth media.

306 **(B)** Single cell HSE-YFP/SSC fluorescence distributions in cells treated across a dose response  
307 of estradiol, ranging from 2-128 nM in cells expressing wild type Hsf1 (gray) or Hsf1<sup>Δpo4</sup> (green)  
308 as the only copy of Hsf1. Cells were incubated in log phase for 18 hours in the presence of the  
309 indicated dose of estradiol to achieve steady state before measuring.

310 **(C)** Quantification of the median HSE-YFP/SSC across the estradiol dose response in wild type  
311 and Hsf1<sup>Δpo4</sup> cells relative to the maximum value.

312 **(D)** Quantification of the cell-to-cell variation ( $CV^2$ ) of the HSE-YFP/SSC distributions across the  
313 estradiol dose response in wild type and Hsf1<sup>Δpo4</sup> cells.

314 **(E)** Overlays of the HSE-YFP/SSC distributions from wild type and Hsf1<sup>Δpo4</sup> cells treated with the  
315 indicated concentrations of estradiol.

316 **(F)** Quantification of fluconazole resistant colonies in wild type and Hsf1<sup>Δpo4</sup> cells in the presence  
317 of the indicated doses of estradiol (\* p < 0.05; \*\* p < 0.01 by two-tailed T-test).

318 **(G)** Fluconazole resistant wild type and Hsf1<sup>Δpo4</sup> colonies plotted as a function of median Hsf1  
319 activity as measured by the HSE-YFP reporter. Dashed line is a linear regression to all six data  
320 points showing a negative correlation.

321 **(H)** Fluconazole resistant wild type and Hsf1<sup>Δpo4</sup> colonies plotted as a function of the variation in  
322 Hsf1 activity as measured by the  $CV^2$  of the HSE-YFP reporter. Dashed line is a linear  
323 regression to all six data points showing a positive correlation.

324 **(I)** Correlation coefficients (r) of the data plotted in **(G)** and **(H)**.

325

326 **Figure S1. Characterization of the microfluidic heat shock device.**

327 **(A)** Schematic of the microfluidic heat shock device. The assembled device consists of a glass  
328 coverslip patterned with Pt/Ti heater and sensor wires (grey), and a multilayer PDMS device  
329 with flow (black and blue channels) and control (red channels) layers. Cells loaded from either

330 port A or B are trapped in chambers (blue) that have been fabricated to the height of a single

331 monolayer of *S. cerevisiae* cells. W denotes waste port.

332 **(B)** Representative calibration curve for the on-chip sensor showing a linear response across

333 the operating temperature range.

334 **(C)** Using the on-chip heater to achieve and accurately maintain chamber temperature of 39°C,

335 as measured by a high-resolution long-wave infrared thermal camera.

336

337 **METHODS**

338 **Yeast strains and cell growth**

339 Yeast cells were cultured in SDC media as described (Zheng et al., 2016).

| DPY number | Description            | Genotype                                                      |
|------------|------------------------|---------------------------------------------------------------|
| 144        | WT HSE-YFP             | W303 MATa 4xHSE-Venus::LEU                                    |
| 118        | Hsf1-3xFLAG/V5         | W303 MATa <i>hsf1</i> Δ::KAN Hsf1-3xFLAG-V5::TRP1             |
| 416        | Hsf1Δpo4 HSE-YFP       | W303 MATa <i>hsf1</i> Δ::KAN 4xHSE-Venus::LEU2 Hsf1Δpo4::TRP1 |
| 1221       | <i>hsc82</i> Δ HSE-YFP | W303 MATa 4xHSE-Venus::LEU2 <i>hsc82</i> Δ::HYG               |
| 1222       | <i>hsp82</i> Δ HSE-YFP | W303 MATa 4xHSE-Venus::LEU2 <i>hsp82</i> Δ::HYG               |

340

341 **Flow cytometry**

342 Flow cytometry was performed as described (Zheng et al., 2016). Data were processed in  
343 FlowJo 10. Data were left ungated and YFP fluorescence was normalized by side scatter (SSC)  
344 for each cell.

345

346 **Microfluidic heat shock time courses**

347 Single cell heat shock experiments were performed with a custom microfluidic device that uses  
348 microscale, on-chip heaters to enable programmable thermal perturbations. The multilayer  
349 device was fabricated out of the silicone elastomer polydimethylsiloxane (PDMS/Sylgard 184,  
350 Dow Corning) using soft lithographic techniques, as described previously (Duffy et al., 1998;  
351 Thorsen et al., 2002; Unger et al., 2000; Vega et al., 2012). The device was aligned and sealed  
352 to a pre-cleaned No. 1.5 glass coverslip (Fisher Scientific), onto which micro-scale heater and  
353 resistance temperature detector (RTD) wires were patterned. Briefly, a thin layer of Ti (100  
354 Angstroms) was deposited on the glass, followed by a layer of Pt (150 nm) and finally a layer of  
355 SPR 220-7 positive photoresist (MicroChem Corp.). After transferring the heater/RTD pattern to  
356 the photoresist using a high-resolution transparency photomask (CAD/Art Services, Inc.), the  
357 Pt/Ti layers were etched in Aqua Regia solution to generate the final serpentine pattern of



358 heater and RTD wires. The photoresist was then washed off with acetone, and a layer of SiO<sub>2</sub>  
359 (300 nm) was deposited on the final pattern. After assembly, the RTD of each device was  
360 calibrated and confirmed to respond linearly to changes in the input temperature, as controlled  
361 by a hot plate, across the operating temperature range of 25°C to 45°C (CITE FIGURE?).  
362 Additionally, the devices were characterized by applying user-defined voltages to the heater and  
363 measuring on-chip temperatures using a Flir A655sc high-resolution long-wave infrared thermal  
364 camera (Flir Systems, Inc.) to validate the device's ability to achieve accurate and stable heat  
365 shock conditions (CITE FIGURE?).

366  
367 To perform microfluidic experiments, we used a custom microfluidic platform that controls the  
368 delivery of liquids to the device and the actuation of valves (Vega et al., 2012). The voltage  
369 across the heater wire and the resistance across the RTD wire were controlled and measured,  
370 respectively, to modulate the on-chip temperature. For each experiment, cells were inoculated  
371 1:100 from overnight SDC cultures into 2 mL SDC and allowed to grow 3-4 hours (OD ~0.5)  
372 before seeding the device. Cells were then loaded into the device to trap a small number of cells  
373 in growth chambers. Cells were grown on-chip in SDC media for 4-5 hours at 25°C, ambient  
374 conditions maintained with a Controlled Environment Microscope Incubator (Nikon Instruments,  
375 Inc.) designed for live-cell imaging. Cells were then subjected to a heat shock by applying  
376 voltage across the heater wire to ramp to and maintain an on-chip temperature of 39°C.

377  
378 Throughout, images were collected at 15-minute intervals at 100x magnification (Plan Apo  
379 Lambda 100X, NA 1.45) using an Eclipse Ti-E inverted microscope (Nikon Instruments, Inc.)  
380 equipped with the "Perfect Focus System", a XYZ-motorized stage, and a Clara-E charge-  
381 coupled device (CCD) camera (Andor Technology). Images were acquired in phase contrast  
382 configuration and in the YFP fluorescent channel. Filters and light sources (Nikon LED and  
383 Lumencor SPECTRA X Light Engine) were automatically controlled using the supplier's

384 software (NIS-Elements Advanced Research). Following each experiment, cells were  
385 segmented using custom image analysis software written for Matlab (Mathworks, Natick, MA),  
386 and fluorescence values for each cell, averaged over cell area, were obtained from the time  
387 series of YFP images.

388

### 389 **Spinning disc confocal imaging**

390 Imaging was performed as described (Zheng et al., 2016).

391

### 392 **Fluconazole acquired resistance assay**

393 Wild type and Hsf1<sup>Δpo4</sup> cells were grown to mid-log phase and 10<sup>6</sup> cells were plated on YPD  
394 plates with 128 μg/ml fluconazole + 25 nM estradiol. Plates were incubated for 4 days at room  
395 temperature. Colonies were counted from 3 biological replicates and mean and standard  
396 deviation were calculated.

397

### 398 **Fluorescence activated cell sorting**

399 10<sup>6</sup> cells from the high- and low-expressing tails (top and bottom 10% of cells) of the HSE-  
400 YFP/SSC distribution in wild type, *hsp82Δ* and *hsc82Δ* cells were sorted in the Whitehead  
401 Institute FACS facility on a BD FACS Aria.

402

### 403 **Estradiol dose responses**

404 Performed as described (Zheng et al., 2016).

405

406

407

408 **REFERENCES**

- 409 Colman-Lerner, A., Gordon, A., Serra, E., Chin, T., Resnekov, O., Endy, D., Pesce, C.G., and  
410 Brent, R. (2005). Regulated cell-to-cell variation in a cell-fate decision system. *Nature* 437, 699-  
411 706.
- 412 Cowen, L.E., and Lindquist, S. (2005). Hsp90 potentiates the rapid evolution of new traits: drug  
413 resistance in diverse fungi. *Science* 309, 2185-2189.
- 414 Duffy, D.C., McDonald, J.C., Schueller, O.J., and Whitesides, G.M. (1998). Rapid Prototyping of  
415 Microfluidic Systems in Poly(dimethylsiloxane). *Anal Chem* 70, 4974-4984.
- 416 Elowitz, M.B., Levine, A.J., Siggia, E.D., and Swain, P.S. (2002). Stochastic gene expression in  
417 a single cell. *Science* 297, 1183-1186.
- 418 Fowden, L., and Richmond, M.H. (1963). Replacement of Proline by Azetidine-2-Carboic Acid  
419 during Biosynthesis of Protein. *Biochim Biophys Acta* 71, 459-&.
- 420 Harms, A., Maisonneuve, E., and Gerdes, K. (2016). Mechanisms of bacterial persistence  
421 during stress and antibiotic exposure. *Science* 354.
- 422 Newman, J.R., Ghaemmghami, S., Ihmels, J., Breslow, D.K., Noble, M., DeRisi, J.L., and  
423 Weissman, J.S. (2006). Single-cell proteomic analysis of *S. cerevisiae* reveals the architecture  
424 of biological noise. *Nature* 441, 840-846.
- 425 Oderberg, I.M., Li, D.J., Scimone, M.L., Gavino, M.A., and Reddien, P.W. (2017). Landmarks in  
426 Existing Tissue at Wounds Are Utilized to Generate Pattern in Regenerating Tissue. *Curr Biol*  
427 27, 733-742.
- 428 Queitsch, C., Sangster, T.A., and Lindquist, S. (2002). Hsp90 as a capacitor of phenotypic  
429 variation. *Nature* 417, 618-624.

- 430 Raj, A., and van Oudenaarden, A. (2008). Nature, nurture, or chance: stochastic gene  
431 expression and its consequences. *Cell* 135, 216-226.
- 432 Raser, J.M., and O'Shea, E.K. (2004). Control of stochasticity in eukaryotic gene expression.  
433 *Science* 304, 1811-1814.
- 434 Raser, J.M., and O'Shea, E.K. (2005). Noise in gene expression: origins, consequences, and  
435 control. *Science* 309, 2010-2013.
- 436 Rodina, A., Wang, T., Yan, P., Gomes, E.D., Dunphy, M.P., Pillarsetty, N., Koren, J.,  
437 Gerecitano, J.F., Taldone, T., Zong, H., *et al.* (2016). The epichaperome is an integrated  
438 chaperome network that facilitates tumour survival. *Nature* 538, 397-401.
- 439 Rutherford, S.L., and Lindquist, S. (1998). Hsp90 as a capacitor for morphological evolution.  
440 *Nature* 396, 336-342.
- 441 Sangster, T.A., Lindquist, S., and Queitsch, C. (2004). Under cover: causes, effects and  
442 implications of Hsp90-mediated genetic capacitance. *Bioessays* 26, 348-362.
- 443 Serio, T.R., and Lindquist, S.L. (1999). [PSI<sup>+</sup>]: an epigenetic modulator of translation  
444 termination efficiency. *Annu Rev Cell Dev Biol* 15, 661-703.
- 445 Shorter, J., and Lindquist, S. (2005). Prions as adaptive conduits of memory and inheritance.  
446 *Nat Rev Genet* 6, 435-450.
- 447 Shorter, J., and Lindquist, S. (2008). Hsp104, Hsp70 and Hsp40 interplay regulates formation,  
448 growth and elimination of Sup35 prions. *EMBO J* 27, 2712-2724.
- 449 Silva, J., and Smith, A. (2008). Capturing pluripotency. *Cell* 132, 532-536.

450 Solis, E.J., Pandey, J.P., Zheng, X., Jin, D.X., Gupta, P.B., Airoidi, E.M., Pincus, D., and Denic,  
451 V. (2016). Defining the Essential Function of Yeast Hsf1 Reveals a Compact Transcriptional  
452 Program for Maintaining Eukaryotic Proteostasis. *Mol Cell* 63, 60-71.

453 Stelzer, Y., Shivalila, C.S., Soldner, F., Markoulaki, S., and Jaenisch, R. (2015). Tracing  
454 dynamic changes of DNA methylation at single-cell resolution. *Cell* 163, 218-229.

455 Stewart-Ornstein, J., Weissman, J.S., and El-Samad, H. (2012). Cellular noise regulons underlie  
456 fluctuations in *Saccharomyces cerevisiae*. *Mol Cell* 45, 483-493.

457 Thorsen, T., Maerkl, S.J., and Quake, S.R. (2002). Microfluidic large-scale integration. *Science*  
458 298, 580-584.

459 Trotter, E.W., Kao, C.M., Berenfeld, L., Botstein, D., Petsko, G.A., and Gray, J.V. (2002).  
460 Misfolded proteins are competent to mediate a subset of the responses to heat shock in  
461 *Saccharomyces cerevisiae*. *J Biol Chem* 277, 44817-44825.

462 Unger, M.A., Chou, H.P., Thorsen, T., Scherer, A., and Quake, S.R. (2000). Monolithic  
463 microfabricated valves and pumps by multilayer soft lithography. *Science* 288, 113-116.

464 Vega, N.M., Allison, K.R., Khalil, A.S., and Collins, J.J. (2012). Signaling-mediated bacterial  
465 persister formation. *Nat Chem Biol* 8, 431-433.

466 Weinberger, L.S., Burnett, J.C., Toettcher, J.E., Arkin, A.P., and Schaffer, D.V. (2005).  
467 Stochastic gene expression in a lentiviral positive-feedback loop: HIV-1 Tat fluctuations drive  
468 phenotypic diversity. *Cell* 122, 169-182.

469 Ye, X., and Weinberg, R.A. (2015). Epithelial-Mesenchymal Plasticity: A Central Regulator of  
470 Cancer Progression. *Trends Cell Biol* 25, 675-686.

- 471 Zheng, X., Krakowiak, J., Patel, N., Beyzavi, A., Ezike, J., Khalil, A.S., and Pincus, D. (2016).  
472 Dynamic control of Hsf1 during heat shock by a chaperone switch and phosphorylation. *Elife* 5.  
473

# Figure 1

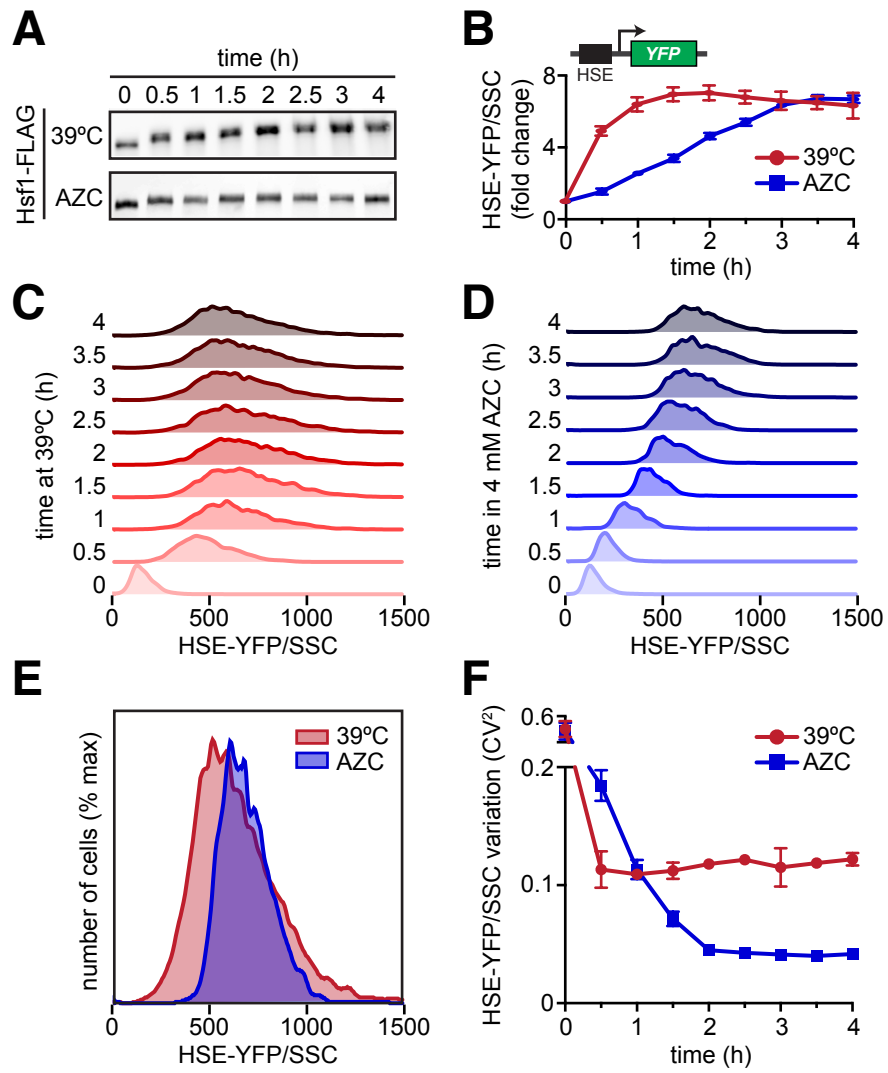

## Figure 2

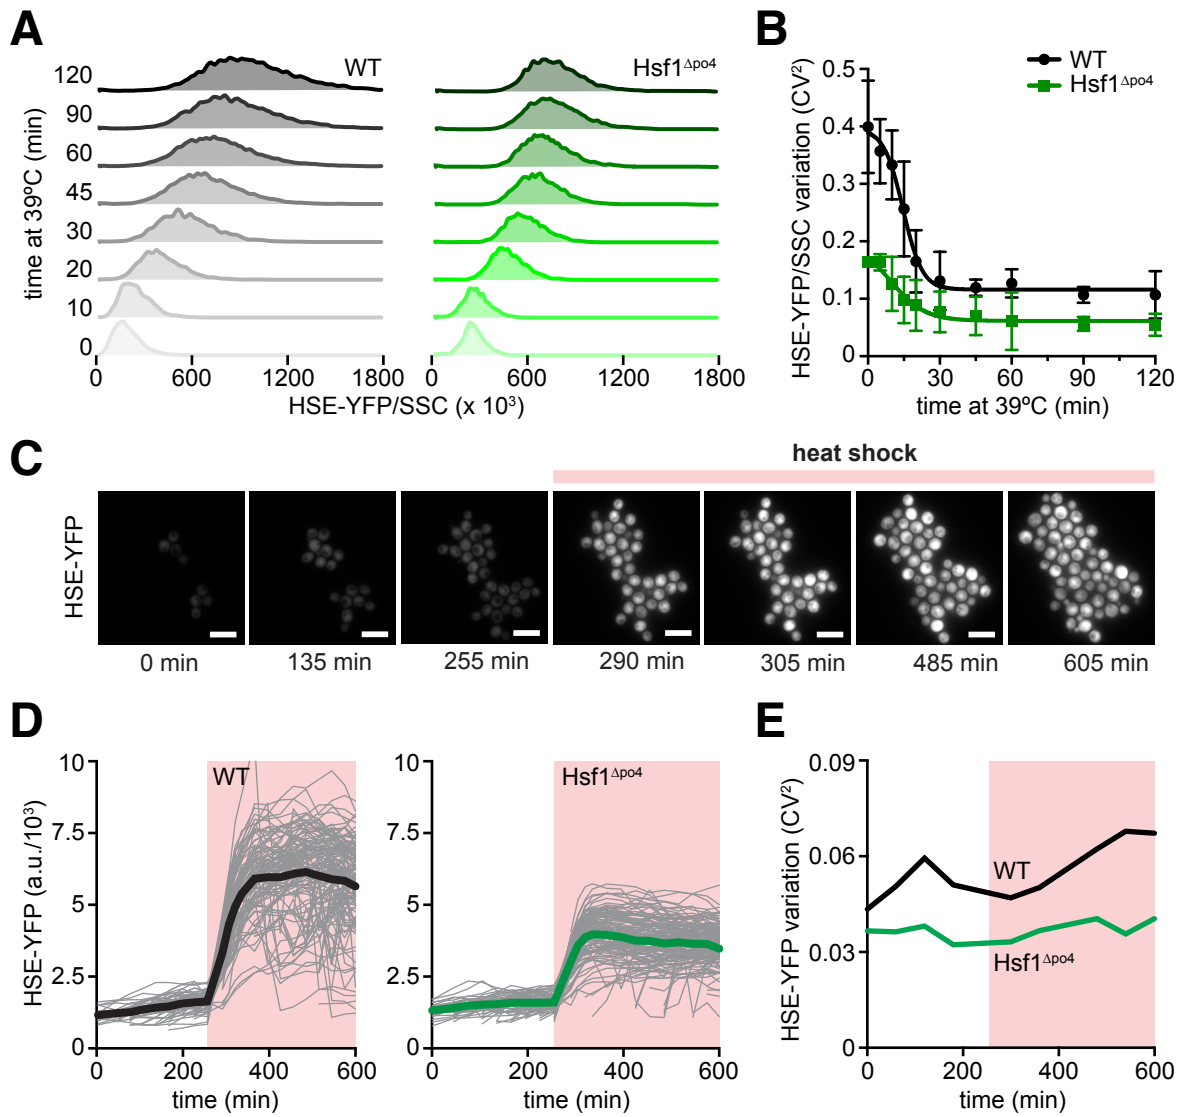



## Figure 3

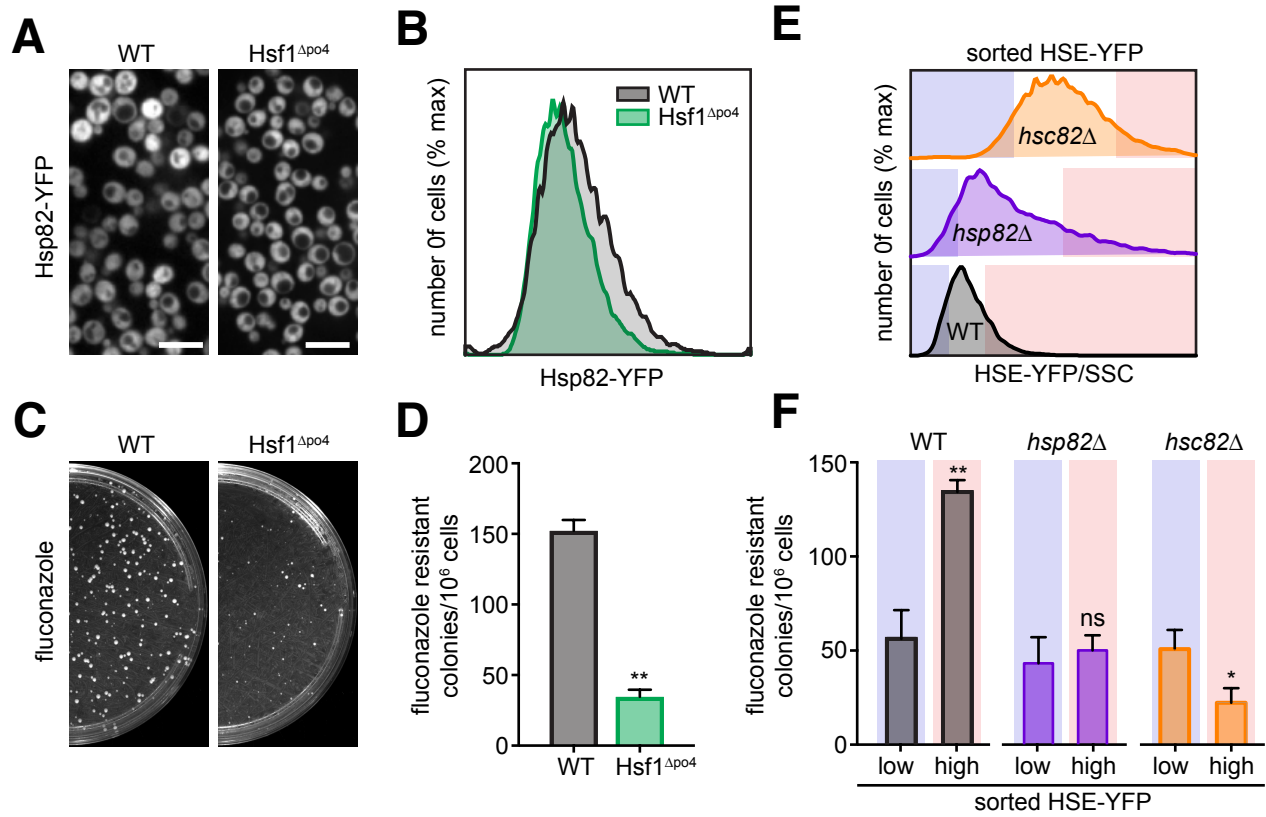

## Figure 4

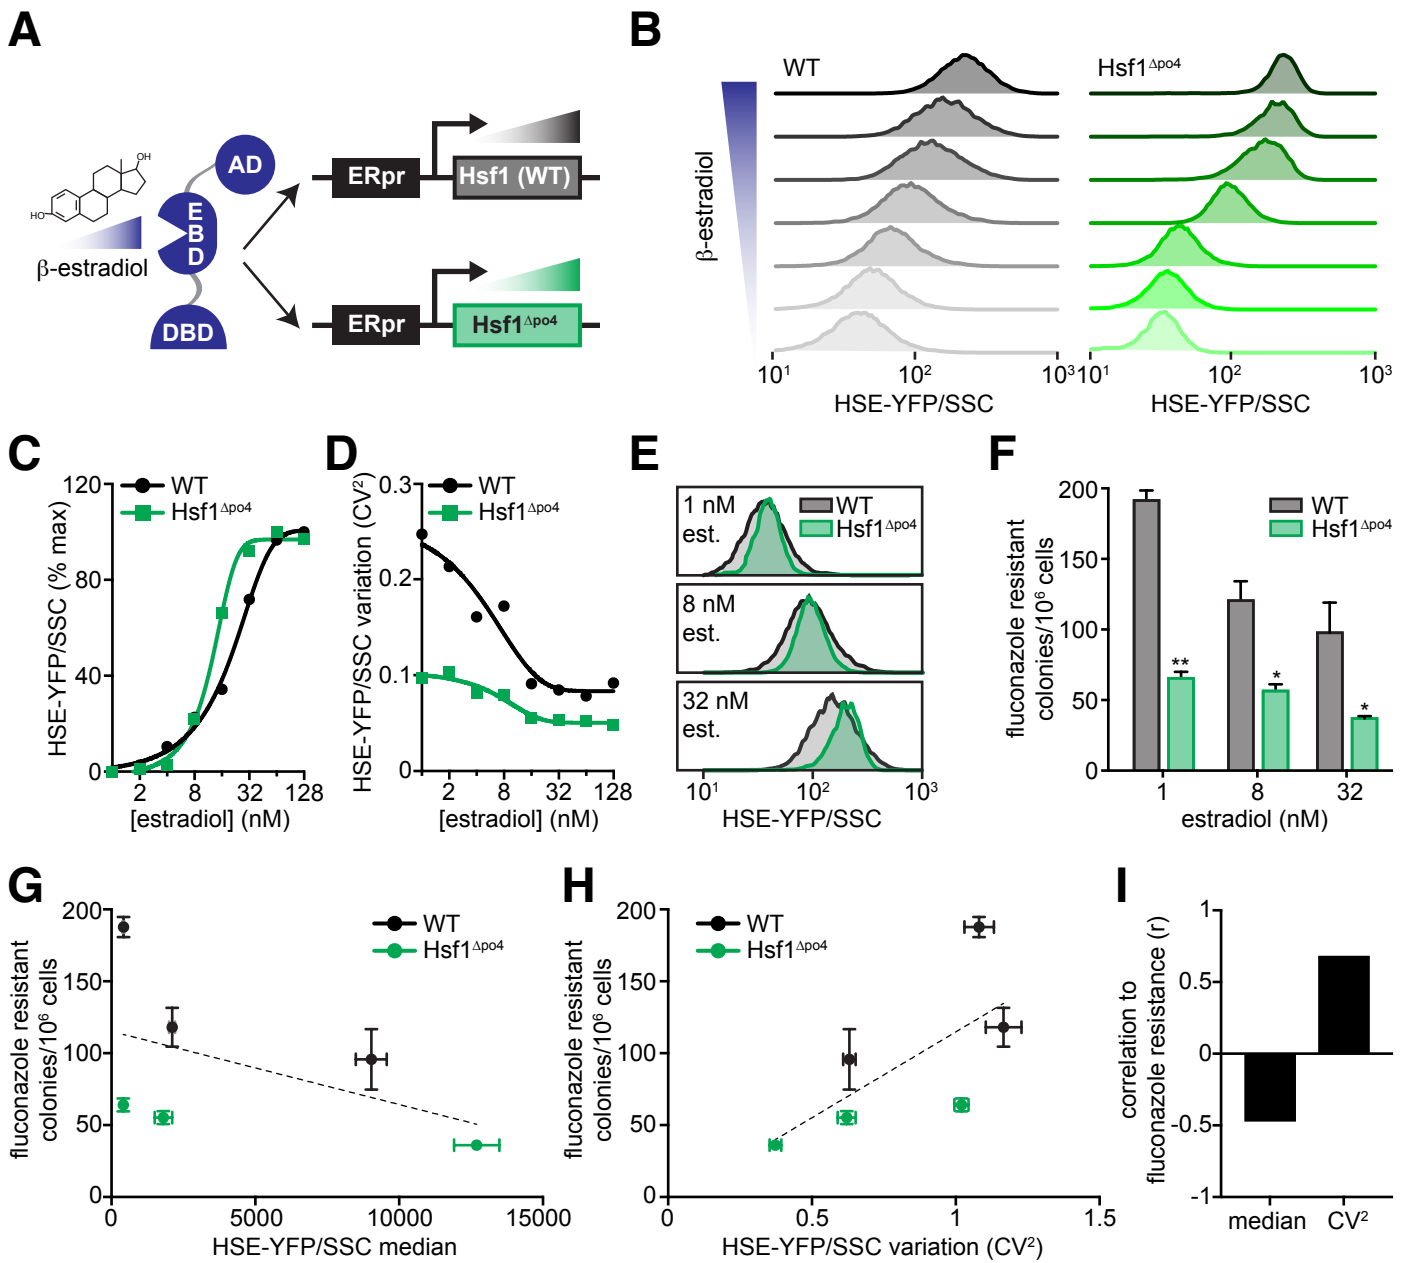

## Figure S1

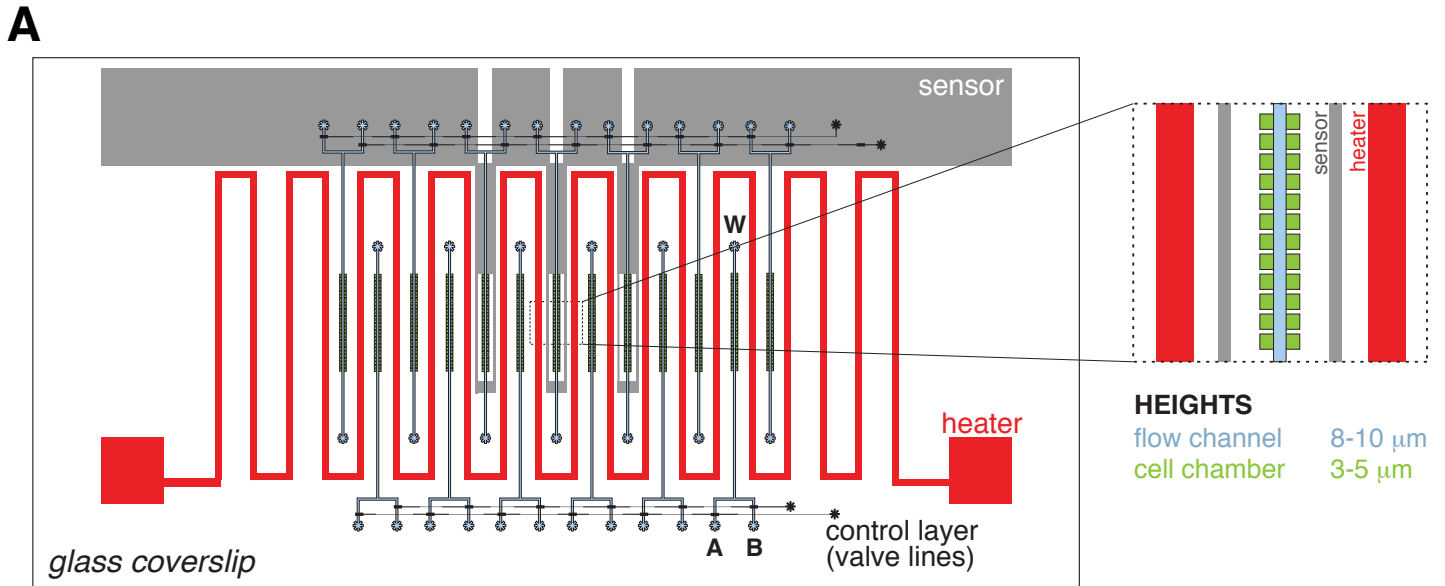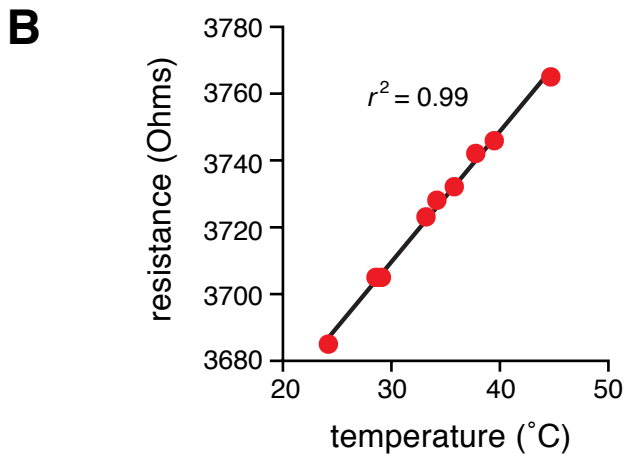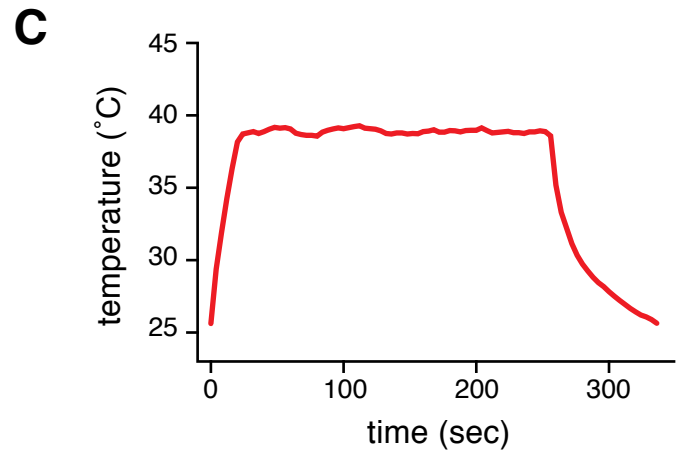

Source: https://www.biorxiv.org/content/10.1101/185934v1.full.pdf
